# Supplementary material for: Average volume reference space for large scale registration of whole-body magnetic resonance images
Source: PLoS One. 2019 Oct 1;14(10):e0222700. doi: 10.1371/journal.pone.0222700 (PMC6772040; doi:10.1371/journal.pone.0222700)
Supplement: S2 File — (XLS) [file pone.0222700.s002.xls]

## Sheet: AMSE fat males
	Initial	Synthetic	Refined
Subj_1	0.08091993112796779	0.08206478294525238	0.07103451306139674
Subj_2	0.04921884816137206	0.05687497712210016	0.04701955804742239
Subj_3	0.07806377499037515	0.08061566985414127	0.0695176612003738
Subj_4	0.06223684572173476	0.06861950849658285	0.05767181437356542
Subj_5	0.06848210503085589	0.07125416108625345	0.05979984932884316
Subj_6	0.04738713493534035	0.05447543869045825	0.045538412532136724
Subj_7	0.056072273801968144	0.06543582668349045	0.05400237082330295
Subj_8	0.04343757437611652	0.051844994961479	0.04208606342938104
Subj_9	0.05410962526115959	0.06323857262360526	0.05194119989470783
Subj_10	0.05307678514761054	0.06108652933108251	0.05050344500798842
Subj_11	0.040785074769768795	0.04974077657281524	0.03925665598851906
Subj_12	0.07901614165602161	0.0824178225837708	0.07069996414898519
Subj_13	0.059706730064482454	0.0661487491440974	0.05590981235815702
Subj_14	0.046925899188371575	0.05573737355250182	0.04579693280034107
Subj_15	0.04561633524534906	0.05343890833659904	0.04384046527188634
Subj_16	0.03621828053694572	0.04384399788877357	0.034934465583025785
Subj_17	0.06390268195997352	0.06846749830972693	0.05828220347011985
Subj_18	0.0479146862400107	0.05588453227883261	0.046080373157387035
Subj_19	0.052816305137494385	0.060518363417323036	0.04976133976749594
Subj_20	0.06893678095536486	0.07166068790884153	0.06100110056155824
Subj_21	0.05098320758442079	0.058559732581574514	0.0484427282729931
Subj_22	0.06164505849612348	0.06847962359664271	0.05771008102544668
Subj_23	0.04380496848063513	0.05374215826338976	0.0426572842156487
Subj_24	0.04809352556283214	0.05549302748900784	0.045983478522765936
Subj_25	0.03150519125157662	0.03966832360977732	0.030597226229592912
Subj_26	0.0482441969765492	0.05651747629311273	0.04659733294826688
Subj_27	0.04769655719878252	0.057354255666182914	0.046964930332757705
Subj_28	0.04797666319091511	0.057631603100197666	0.04674621761027686
Subj_29	0.043656307487326615	0.053693916174298376	0.0429155723404576
Subj_30	0.0466054746711443	0.05612774790492268	0.045661307227047816
Subj_31	0.0567181001213778	0.06361669720642002	0.05295640333575929
Subj_32	0.04574408031553394	0.0543201044793313	0.044485383175215644
Subj_33	0.0391805642194852	0.04759459069553122	0.037942710912704396
Subj_34	0.03864590250773612	0.046423353248769436	0.03682480925214568
Subj_35	0.03908078255554625	0.046944434426017714	0.037857369617503044
Subj_36	0.055085280083087815	0.06196499358342197	0.052250441812618696
Subj_37	0.05178357514086912	0.05879865860144438	0.04883218414502328
Subj_38	0.053963358524393955	0.061394156338416356	0.05011500854825999
Subj_39	0.039819459465092	0.049810584446903894	0.03948105117759279
Subj_40	0.040419798056384695	0.04800089883231199	0.038462251196110436
Subj_41	0.04348133484162896	0.05096006433803739	0.0418860735764025
Subj_42	0.033903754939278885	0.04222130546141225	0.03304058929701866
Subj_43	0.04108856330411782	0.04941844715043646	0.03939894306794252
Subj_44	0.037924982738700264	0.04722267006084983	0.037830922092407335
Subj_45	0.04339225654268197	0.05094532491462506	0.04152277925572001
Subj_46	0.04146879389575202	0.04971424830219068	0.04034336295976504
Subj_47	0.04814001378185664	0.057038648309080967	0.04619279784872379
Subj_48	0.04991229847722012	0.058958137749719	0.048597315587978175
Subj_49	0.038746794779506405	0.04716427422150544	0.037090398118521516
Subj_50	0.04112067025289591	0.05050247942603925	0.040229649704363706
Subj_51	0.03925833508345831	0.047670875033913124	0.037525727544130125
Subj_52	0.03750141327206184	0.046147943707447105	0.03613245335061647
Subj_53	0.04201393244624985	0.050074168132646604	0.04043804382113681
Subj_54	0.03760811657121019	0.04600873841570813	0.036145271703321546
Subj_55	0.04005633040674851	0.04807790988045355	0.03815810970410532
Subj_56	0.04386901877590454	0.05128293879273592	0.041922691673736384
Subj_57	0.041201301010689625	0.05062483581742467	0.04059695102191541
Subj_58	0.03469052777493641	0.042681275730908526	0.03370712008690372
Subj_59	0.03518915922922281	0.04302635857043809	0.034262434003987756
Subj_60	0.03849505490694101	0.046792151723001926	0.03699004824814501
Subj_61	0.04095183269295204	0.04987755613429166	0.03985134680850606
Subj_62	0.03739901397153461	0.04471830711077425	0.035164425484796154
Subj_63	0.039127742704244114	0.0480383344781255	0.03827271788911809
Subj_64	0.05717243625652194	0.06301695306208578	0.052972740847763454
Subj_65	0.04416195181655925	0.051680412022901585	0.042028101597254224
Subj_66	0.04340336576719304	0.05141591322116523	0.04134531740529088
Subj_67	0.041921906159943234	0.05021812058860261	0.04009990846148546
Subj_68	0.03749054001238746	0.044328619095348624	0.035972573839094614
Subj_69	0.03680259868892651	0.045269526556666134	0.0359122771154252
Subj_70	0.04404117872074892	0.05291939160397225	0.042599520882946974
Subj_71	0.03986783225661215	0.04938925764175685	0.038886407459164295
Subj_72	0.036422311465731515	0.04471020564271288	0.035430145562656376
Subj_73	0.036691827355993745	0.04473146863197695	0.035350019082859986
Subj_74	0.03703815137369541	0.04483232316190878	0.0360753124313663
Subj_75	0.04008677616307634	0.04830894638927527	0.038232146625267534
Subj_76	0.045306912981906894	0.053721598433106095	0.04364062345237736
Subj_77	0.043396827968117994	0.05250227365951656	0.042229386743091415
Subj_78	0.04841289924998671	0.05533275770742988	0.04489010668099272
Subj_79	0.04397812891638705	0.05150594785023104	0.041318994362885476
Subj_80	0.03674585701119865	0.04437195925795936	0.035837580772444026
Subj_81	0.036538988211977014	0.04383609155574025	0.034896003796116466
Subj_82	0.007918747887013543	0.008570813223210787	0.005906151053083187
Subj_83	0.03644659382052517	0.044814814839736275	0.03570953855006869
Subj_84	0.03918015521376828	0.04754779529716508	0.03832414606220205
Subj_85	0.04266566732517007	0.05016037071348903	0.040559414444190846
Subj_86	0.04183029202555136	0.05052421679528532	0.039977891874200616
Subj_87	0.037956139535735976	0.04539794222711241	0.03736357033581527
Subj_88	0.03789327221084781	0.04605074627709282	0.036387303061655135
Subj_89	0.03807594989501264	0.046560546631081216	0.03672912916485438
Subj_90	0.04211183897628663	0.04951157029598081	0.03996727720155376
Subj_91	0.03781782324086767	0.04617121860613838	0.03740998892171344
Subj_92	0.03662755053448112	0.044610713693580405	0.034923524563866486
Subj_93	0.03241350170911533	0.04048598984328908	0.03176932496199577
Subj_94	0.04073796360357545	0.04793888626615449	0.03879807521499843
Subj_95	0.03983895016060207	0.04863361070319666	0.03887761628971065
Subj_96	0.040755167013268596	0.04881490123745214	0.03970522431646218
Subj_97	0.03578008439663074	0.04413280109469405	0.034712348090745054
Subj_98	0.03699874209977142	0.044749333580235216	0.03546288451020839
Subj_99	0.041326856327190076	0.04979482224679279	0.03952732509441844
Subj_100	0.040442419218728105	0.04844680592220007	0.03943350215429071
Subj_101	0.03664452112553541	0.043563736886926115	0.03497829694760369
Subj_102	0.050209519785506834	0.05817207329756127	0.047483397373509435
Subj_103	0.03837553085166619	0.046441164366675135	0.03671840010270831
Subj_104	0.0358209188981683	0.04306624349729341	0.03392237420923212
Subj_105	0.04088717203530507	0.04899508152068593	0.039453062758654844
Subj_106	0.038418898042450814	0.045999129697774865	0.03681055093750942
Subj_107	0.03692838367786801	0.04519750827372519	0.0355149149103617
Subj_108	0.03876637986095115	0.046990334894772424	0.03720612328335006
Subj_109	0.04224470605652645	0.05062190206320975	0.04000235440504541
Subj_110	0.04065748071707939	0.049223847061508716	0.039145731818260115
Subj_111	0.042093751485005375	0.049530256157115725	0.040458580100641225
Subj_112	0.035082138164094404	0.042457297727067196	0.033532598719483574
Subj_113	0.034068486711064466	0.04128356053330807	0.032799281284047695
Subj_114	0.03541516005740276	0.04237255529453816	0.033620883862090944
Subj_115	0.040264778597277014	0.048313326834215437	0.03894768658676807
Subj_116	0.0395829817981633	0.04626876256938733	0.03710779877998889
Subj_117	0.04138759682235027	0.04930578358691018	0.0395009885944249
Subj_118	0.036542461614373	0.043892418290907835	0.034930347561054384
Subj_119	0.04016911216008982	0.04830193498585338	0.03866723381428959
Subj_120	0.042479437583663696	0.05082665926678753	0.04126383170909216
Subj_121	0.03988351919895488	0.04838800971960846	0.038909719366222964
Subj_122	0.04153407120817218	0.048678185599519405	0.03928126991723045
Subj_123	0.039006236544341155	0.046570750847289746	0.03696053239295296
Subj_124	0.04376865506536843	0.051317121066616136	0.0414700557897774
Subj_125	0.040675945752099346	0.04867629480838548	0.03922259146853508
Subj_126	0.05964273640077385	0.06787467136569758	0.057195234075905106
Subj_127	0.03872581907862414	0.04648305783856062	0.0369925244443631
Subj_128	0.03759973195401336	0.04459741086770222	0.035835999505837365
Subj_129	0.03884808976459796	0.04682004593882288	0.0374802913621663
Subj_130	0.04148759242774115	0.047949275524199975	0.03849580432774503
Subj_131	0.039032790453962615	0.04580698561868301	0.03697339784721654
Subj_132	0.04019174905342234	0.0481808537009444	0.0381365674698873
Subj_133	0.039924992378650395	0.046240488176701365	0.037528755501462036
Subj_134	0.048172378718856164	0.05558358696401118	0.04569815073898308
Subj_135	0.0351056559928172	0.043093656604338296	0.033692552247740204
Subj_136	0.04358805072556859	0.05001701712020533	0.040748241227805744
Subj_137	0.0395344045037847	0.04808372692292785	0.038752423711624344
Subj_138	0.038397293102004064	0.04725749829896086	0.03738992365779399
Subj_139	0.037684921552451796	0.04445505313594102	0.03503550515479456
Subj_140	0.04305523268574347	0.05020702480717968	0.04060684907799372
Subj_141	0.03884836348380851	0.0456645605989811	0.03626642364056828
Subj_142	0.03795224454283178	0.04540375926958671	0.03604925854072374
Subj_143	0.03974074159557434	0.04771443051793412	0.037898230219498646
Subj_144	0.046638720543534115	0.053519182849864996	0.04306731001115365
Subj_145	0.04373445274884059	0.05183982051883847	0.04254721796663379
Subj_146	0.04070577170745616	0.048227639006119434	0.03935911197143977
Subj_147	0.04488239965592174	0.0531469392330682	0.04239914075991232
Subj_148	0.04416319456469912	0.051003606364470246	0.04088706634267972
Subj_149	0.03756960396366559	0.04556862145311807	0.03565430860833466
Subj_150	0.04523909983404184	0.05284735986344316	0.042747113616495344
Subj_151	0.04873584701786758	0.05553037566049843	0.04510898762332534
Subj_152	0.04493831702982012	0.05237849412818514	0.04250488039433963
Subj_153	0.04542890051007669	0.05354010267063145	0.043182469957280235
Subj_154	0.04446033092564462	0.0518609085594567	0.04201138054398801
Subj_155	0.04679288109063627	0.05548631215252507	0.044591129538437024
Subj_156	0.05054002786675505	0.0587270642325299	0.0470028302653621

## Sheet: AMSE water males
	Initial	Synthetic	Refined
Subj_1	0.06714762005488177	0.07030447927746748	0.06028911340332715
Subj_2	0.04941973918473105	0.05559429583977503	0.04607534001942199
Subj_3	0.06292518975851698	0.06713078972357038	0.056731068403305614
Subj_4	0.05490903008107425	0.06118862532352042	0.05104919394430066
Subj_5	0.05852413093458486	0.06078873982068033	0.05177234417189539
Subj_6	0.04750536590331014	0.05494200654254105	0.04594930970647385
Subj_7	0.04966846814598036	0.05856714771264066	0.04740038087665959
Subj_8	0.03750729666198982	0.044560436144282574	0.03532372632002791
Subj_9	0.05157575933610293	0.05969900489210244	0.0492369312015796
Subj_10	0.052609754104252816	0.0599611317939288	0.04970763726201601
Subj_11	0.036639046741324344	0.044786385684786684	0.03511206873813041
Subj_12	0.06532010071054739	0.06884579784118754	0.05836389103014069
Subj_13	0.05288698132537786	0.058693608668409336	0.04899826760467851
Subj_14	0.04245995003435145	0.051250193116389835	0.04142800082683422
Subj_15	0.041447305364624695	0.04913190145492677	0.039871778791702374
Subj_16	0.03246345389194235	0.040060131195335275	0.03129691315226238
Subj_17	0.05144971321274217	0.0576752191433653	0.04789061053309275
Subj_18	0.047145673691060895	0.055055329527886276	0.04503592301290636
Subj_19	0.045126006607116104	0.051373414157813366	0.04181908170263252
Subj_20	0.05223374885629417	0.05761085149928298	0.04766528004164316
Subj_21	0.04805894884876343	0.055049499027823835	0.04520409576312061
Subj_22	0.05606821520677718	0.06269125924267153	0.05193576975789261
Subj_23	0.042617008229648076	0.05080698090852716	0.04055566314149631
Subj_24	0.04483268658412923	0.052531103177713374	0.04291508113849042
Subj_25	0.02901684766281297	0.03616320730391756	0.028211897328830244
Subj_26	0.04255664527822658	0.05038175813161306	0.04064473555300998
Subj_27	0.050324695795391026	0.058507194157468856	0.04826646414790858
Subj_28	0.04647547692331855	0.05500824142697805	0.044259978667031276
Subj_29	0.04140526901551896	0.049545826586595815	0.039653459703674676
Subj_30	0.04287387011226842	0.05118568416763202	0.04123364633889006
Subj_31	0.05138222412325283	0.058721445689480685	0.048628234396734006
Subj_32	0.04440607789039432	0.05206496933284814	0.04275317625995323
Subj_33	0.0350149353786069	0.04273611540258644	0.03378244557213052
Subj_34	0.035948534974242455	0.04353467186093682	0.03446589927910392
Subj_35	0.038664943296957584	0.046239916229205334	0.037002869965247126
Subj_36	0.04320634456715567	0.05043736488581506	0.041033340232590185
Subj_37	0.04392315854803323	0.05022449275658776	0.04075754378560878
Subj_38	0.04345977709414954	0.050061649211277676	0.040423455795591076
Subj_39	0.038059781584403075	0.04514299158416268	0.03615204087015688
Subj_40	0.036657146817396895	0.04462140574735908	0.03537778208719656
Subj_41	0.03913644508742101	0.046063204639315104	0.03753674594442124
Subj_42	0.03137421818242591	0.03817768713045463	0.030123364364737244
Subj_43	0.03702532432517329	0.045474367870169806	0.036023658843680965
Subj_44	0.036694835121112004	0.04498000336978007	0.03579564692779412
Subj_45	0.041995612136329734	0.05005449313878326	0.040425040426594776
Subj_46	0.04068402204190957	0.0486727958354686	0.03910802702068378
Subj_47	0.04352398469931007	0.050998152676875776	0.04086958830008053
Subj_48	0.048122461144205195	0.05647380641959253	0.04587581781763138
Subj_49	0.034679302141105914	0.0416705637598994	0.033206040250031224
Subj_50	0.04044328442312928	0.04859775295959278	0.038679355736808335
Subj_51	0.035091507541209654	0.04289359609902201	0.033477200557897775
Subj_52	0.035125741319715714	0.04338100975513649	0.03415448059631111
Subj_53	0.03872267602699951	0.046478411606254655	0.03729140065500773
Subj_54	0.03414307676903908	0.041973352764296264	0.03314893970354548
Subj_55	0.03733470883424159	0.045672416466058886	0.0359243384787973
Subj_56	0.04244246975924992	0.050035467473547764	0.041086676018793254
Subj_57	0.037588113045455056	0.04498982404472656	0.03570522539306924
Subj_58	0.032482589067098486	0.03929813900396622	0.031199063028883214
Subj_59	0.0331009962724855	0.04067904903837458	0.03206558367174682
Subj_60	0.03650664529836225	0.04387120240320226	0.03506797495058374
Subj_61	0.04140708751786033	0.04912623244592203	0.039614604282312206
Subj_62	0.0329573975114733	0.04093157395106175	0.03224706597663332
Subj_63	0.03693771844680721	0.044539566789471643	0.035475019890315276
Subj_64	0.04632877915745124	0.053007686839770723	0.043249367627933216
Subj_65	0.03787771111641798	0.045410612546347935	0.03613634595798649
Subj_66	0.04413963898160245	0.05151985626757561	0.04184795159359376
Subj_67	0.039166230142206125	0.046956489060595755	0.03777400658775855
Subj_68	0.030874800178683902	0.038142340775200144	0.030070317916679228
Subj_69	0.033852600908883694	0.04152052847410329	0.032999109645968534
Subj_70	0.04217059107442303	0.04959215433377402	0.04031846642170268
Subj_71	0.03876694932275701	0.04635374050970884	0.037128533558918396
Subj_72	0.03361359369890575	0.040276431645141705	0.03222111301790182
Subj_73	0.03440775695324821	0.04266445374573125	0.033712499757763414
Subj_74	0.03687188111117465	0.04466177851178454	0.035587804572134826
Subj_75	0.03773918717249339	0.045748845473513315	0.03598933862952229
Subj_76	0.04119235322408258	0.04936296824332181	0.03962421972903954
Subj_77	0.042934966127782546	0.05004947009400933	0.04051352743302428
Subj_78	0.04844763012774872	0.05598583427357016	0.04542446040454587
Subj_79	0.043019340860984974	0.050600716455077493	0.04063342445017678
Subj_80	0.03679220050512332	0.04392291655003423	0.03515755875044679
Subj_81	0.034321233366933046	0.041955867992903004	0.03329053708157667
Subj_82	0.007088269644305472	0.00738288836715315	0.005492475307344398
Subj_83	0.03459500291665123	0.0417181800711422	0.03311570618962926
Subj_84	0.03894255120801915	0.046839771398641754	0.037527981690143875
Subj_85	0.03685037999525604	0.04433018690436715	0.03535813737290654
Subj_86	0.03640609596215461	0.04484794069294736	0.035262043464779874
Subj_87	0.038363968574668686	0.044984464560249085	0.037248884769670684
Subj_88	0.035712315295535195	0.04319335378168993	0.03442095429910728
Subj_89	0.039012327583325415	0.0457166381006929	0.03683841150936002
Subj_90	0.04247814135016084	0.04906055268699588	0.03987702725107768
Subj_91	0.037702946119776606	0.04492300711960243	0.03576769551722356
Subj_92	0.03294661549153577	0.04128099686276705	0.03222251260706857
Subj_93	0.03087888708965526	0.03815764878171146	0.030122879891564137
Subj_94	0.0404298470122296	0.04698245211251836	0.037970224951660345
Subj_95	0.03865825448038705	0.04624836423016136	0.03697250291760511
Subj_96	0.037342300609587153	0.04557786345177446	0.036154305109361747
Subj_97	0.03420357500696694	0.04111494031828811	0.03252244523838233
Subj_98	0.03233162191078611	0.04046224729340987	0.03169872981900082
Subj_99	0.040979418555459265	0.04913088204262503	0.038911788470399764
Subj_100	0.039104769167744594	0.04715189996920904	0.03783415527795841
Subj_101	0.036682967662925725	0.044850484177106166	0.036017306862078026
Subj_102	0.05147710086478659	0.0599223873976685	0.0491268178510062
Subj_103	0.03503007802872635	0.04397429089276563	0.034768641181942284
Subj_104	0.03488819709172521	0.04221211729310842	0.03335804370809307
Subj_105	0.039264284543540556	0.04777215684226845	0.03830327670739112
Subj_106	0.03713189233781526	0.04494023283242396	0.03575838286622942
Subj_107	0.03203396957339773	0.03996187734431186	0.03108837436641675
Subj_108	0.037426911307626265	0.045128154593236325	0.036016223526232606
Subj_109	0.03908961078663604	0.04619553310351361	0.03710460933159928
Subj_110	0.036800308256911766	0.0455629120713489	0.03644826930033461
Subj_111	0.038601997317123854	0.04713979150427844	0.03793601576260384
Subj_112	0.03143417527432831	0.03966891910805259	0.030802535194284508
Subj_113	0.031067067473811553	0.038343767225712824	0.030033716641330515
Subj_114	0.031610982153356455	0.03842063024038482	0.030313802694532127
Subj_115	0.0372140961945202	0.04502054098966027	0.03580584441520858
Subj_116	0.036928704590045894	0.04494372507654676	0.03581066896055742
Subj_117	0.033795078974095866	0.043119952731567414	0.03296952986723282
Subj_118	0.03422209038115205	0.041354074930774164	0.03278508016416104
Subj_119	0.03778582326281554	0.04471695125876896	0.036097278579610786
Subj_120	0.04016734399691361	0.047638411966918016	0.03780894585097175
Subj_121	0.03649646105601098	0.04500059347963706	0.03569994665412061
Subj_122	0.04215139297531045	0.049723914214873544	0.0400847484884437
Subj_123	0.036009410755909015	0.04385541328791487	0.034616906875643276
Subj_124	0.0407348457215334	0.04825640460077257	0.03856859305760709
Subj_125	0.038032258645852295	0.04580270947005095	0.03706323061246022
Subj_126	0.08077119147971372	0.08900438340560955	0.0788463065380193
Subj_127	0.04054698310335718	0.04633699927006042	0.03730622755274298
Subj_128	0.032372409219356336	0.04129259393934827	0.03231906070879502
Subj_129	0.03953035220098938	0.04663261201558066	0.037314416495127276
Subj_130	0.038051853165890506	0.04571908065294064	0.03664422524126764
Subj_131	0.035476385067027605	0.044075148787094495	0.03479326856824182
Subj_132	0.03828508710286426	0.04628627089155983	0.03673768482651554
Subj_133	0.037598709439721066	0.04388814887106984	0.035643572817394525
Subj_134	0.04517652825174898	0.05277063142465258	0.04317706673564129
Subj_135	0.03564517858020197	0.042989319923474774	0.033630936680432884
Subj_136	0.03819317093348142	0.046009784743186156	0.037282283139041646
Subj_137	0.04180155465464111	0.04864218655124004	0.03932075111644151
Subj_138	0.036187337681361946	0.043557748260203005	0.03504377484270771
Subj_139	0.032673365064458296	0.04061276368798205	0.03169928830890871
Subj_140	0.04118689457086063	0.04809801215274039	0.03882344949743983
Subj_141	0.035131731680369656	0.043082692034399746	0.0338213211798752
Subj_142	0.033944784505081434	0.04213182595785729	0.03281989158028689
Subj_143	0.037548640847574616	0.044552482709690755	0.03545440286528201
Subj_144	0.040850072070582756	0.049103256978566906	0.03929873786663853
Subj_145	0.03924079817679598	0.047389466772676574	0.0386133832753401
Subj_146	0.037008781617022854	0.0441952644900543	0.03616639675230717
Subj_147	0.04222781412041773	0.0500572485799553	0.03984957713566541
Subj_148	0.03985726103192872	0.047711170417206766	0.03817265735688662
Subj_149	0.03362455819831698	0.04165389653698576	0.03290088943891547
Subj_150	0.04249473439747644	0.05020115393435281	0.0406321358861122
Subj_151	0.04290517478060178	0.05087139228977094	0.04092415881999561
Subj_152	0.040415796092754544	0.04896365805237478	0.03950182969368376
Subj_153	0.04101810735008191	0.05070787250065673	0.04038353386036837
Subj_154	0.041386372951397334	0.049198021949864564	0.039594458272863904
Subj_155	0.0428418009178642	0.05164521033671962	0.040687197607994455
Subj_156	0.04745374308943941	0.05684541752974665	0.04488633182751894

## Sheet: MI fat males
	Initial	Synthetic	Refined
Subj_1	0.4332331760804474	0.39067680986269687	0.44803580492138817
Subj_2	0.5848955792944084	0.5029708540817196	0.5804734915098702
Subj_3	0.4615683872430593	0.4124018480627813	0.47152859569422856
Subj_4	0.5052782636172841	0.4427818069985889	0.5074224494697572
Subj_5	0.4569182379574142	0.40523837534223894	0.4747247297338234
Subj_6	0.5668785797612107	0.4851113583252425	0.5608053284921727
Subj_7	0.5515907168528977	0.4727384758051626	0.5387638986086685
Subj_8	0.640222842174573	0.5532990120765999	0.6301544207341814
Subj_9	0.5426118643604922	0.458416234104167	0.5327949253828882
Subj_10	0.5389044419366512	0.47009453943435175	0.5442652169979895
Subj_11	0.631956570738836	0.5365812787538389	0.6238305076457201
Subj_12	0.4358853170764965	0.3814613610054195	0.4419545509414796
Subj_13	0.5189876769320726	0.4569067044805736	0.5222603994309756
Subj_14	0.6058065250330571	0.5215058060177242	0.5950719067721084
Subj_15	0.6140883046940396	0.5246674718354859	0.606738400521758
Subj_16	0.6697718589599662	0.5770177864259766	0.6575115401880447
Subj_17	0.5045956699795904	0.4476586075140848	0.5119284846865853
Subj_18	0.5774731786502432	0.494697657844483	0.5693472340915384
Subj_19	0.5676328084018495	0.4971142370745873	0.5675204320523176
Subj_20	0.47470134765814354	0.4189719024518301	0.48853821759792526
Subj_21	0.5735279696066121	0.4967669100177016	0.5659027884829894
Subj_22	0.5163278542524982	0.44626237650902356	0.516323448800377
Subj_23	0.5978401161098491	0.5034962645755878	0.5859005745953993
Subj_24	0.5862101674736261	0.5101842329192221	0.5837599172915391
Subj_25	0.7027623833643613	0.6029118700568552	0.6952079566976398
Subj_26	0.6021933491825717	0.5185853910268862	0.5903996129401875
Subj_27	0.5908853212218398	0.501721159998845	0.5734526636627163
Subj_28	0.5817923260077312	0.49126531807907226	0.5658769063201192
Subj_29	0.60356079201148	0.5120669639172464	0.5889140147884455
Subj_30	0.5899346354783268	0.5011762502323738	0.5790015884097759
Subj_31	0.5367415774584807	0.4670844846012454	0.5386122654417925
Subj_32	0.589644958780253	0.5040903172646856	0.5791428649028262
Subj_33	0.638118352645908	0.5454898529873426	0.6307068265022756
Subj_34	0.6483847971965305	0.5584345231274636	0.6473333252909826
Subj_35	0.6379492673559948	0.5489203230648576	0.6302426665032322
Subj_36	0.5799744888773055	0.5042587777407139	0.5718546454274245
Subj_37	0.5626326490244554	0.4868856338495901	0.558857721708712
Subj_38	0.5582428901606629	0.4880950528270891	0.5641546935206366
Subj_39	0.6477184074909248	0.5453921223503629	0.6233298009171206
Subj_40	0.6215293994832238	0.5353008084365272	0.619129382891151
Subj_41	0.6161861089184059	0.5291986959752816	0.6060540383848665
Subj_42	0.6860629534605197	0.5831713051716226	0.6755437068619231
Subj_43	0.6224494814970177	0.5286815975417163	0.6142522290276298
Subj_44	0.6496498155720256	0.5497576012791106	0.6332918058501475
Subj_45	0.6005794048353174	0.5206660389650338	0.5995944816206231
Subj_46	0.6223001634724457	0.5337318024657957	0.6140091125205603
Subj_47	0.581491250383332	0.4993366572869777	0.5782832185163044
Subj_48	0.575568818611235	0.4929712900324995	0.5642583967368225
Subj_49	0.6252882417995417	0.5311568431809587	0.6197909559872181
Subj_50	0.6205482328607559	0.525964625372624	0.6081969500215403
Subj_51	0.6410995294473353	0.5508723487347045	0.6378679613593664
Subj_52	0.6478987524263472	0.5514360493272152	0.6415635471987644
Subj_53	0.6093385746532247	0.5271192983515508	0.6048754628236508
Subj_54	0.6551914245803889	0.5554802243584027	0.6468239826308414
Subj_55	0.6360234462462373	0.5487264175648704	0.6324893308768702
Subj_56	0.628312528499028	0.5427501416173114	0.6235525921164753
Subj_57	0.6307316614649089	0.5379495012045926	0.619287090477315
Subj_58	0.678160427548808	0.5804369029266	0.6667852934588442
Subj_59	0.6753790750659823	0.5809671402159384	0.6608379138494694
Subj_60	0.6224354150022643	0.5309900924409013	0.6178315432709219
Subj_61	0.6288565175019422	0.5361933732016146	0.6204585246670141
Subj_62	0.6541950302460701	0.5611054132540407	0.653631608742313
Subj_63	0.6513897798491624	0.5539326030579964	0.6384730538721869
Subj_64	0.551831704721379	0.48864079214773837	0.558726096722885
Subj_65	0.6157833463599006	0.5281912785183143	0.6144836346272445
Subj_66	0.6032328259907053	0.516521898309942	0.5976155121931863
Subj_67	0.6056202231959152	0.5184524666429507	0.6027937657402165
Subj_68	0.6908652580197705	0.6057577951289255	0.684331893985003
Subj_69	0.6535286063277127	0.5541428375739972	0.6426158984095256
Subj_70	0.5835439333565566	0.4900581001463889	0.5763131092503959
Subj_71	0.6208809612427311	0.5201389574086095	0.6079395890637784
Subj_72	0.6572054957085314	0.5578968443359864	0.6449839817207644
Subj_73	0.6453810190902255	0.5550221536486956	0.6406005444796027
Subj_74	0.6492847989701672	0.5614623893004895	0.6410910617666495
Subj_75	0.6385755243361387	0.547545008653194	0.6369580971289609
Subj_76	0.5885917002993178	0.5007838412371722	0.582826666823905
Subj_77	0.6012043264060984	0.5128131495534501	0.5905770807229734
Subj_78	0.5771472537648751	0.4998108423104474	0.5850397533518532
Subj_79	0.5883048449397975	0.5096796343397945	0.5932621343904707
Subj_80	0.6647813294663563	0.572347528668674	0.6539882914044228
Subj_81	0.6537264136681821	0.5648680527376608	0.6482755345962132
Subj_82	1.315565030509242	1.2656670781873014	1.3879903106568394
Subj_83	0.6581789616326789	0.5641369442845119	0.6455964081363621
Subj_84	0.6253012337363155	0.538388100223528	0.6200881886212827
Subj_85	0.6358036506722302	0.5441966775158292	0.6305785072433784
Subj_86	0.6123348487923764	0.517014303341949	0.605627272730208
Subj_87	0.6218319285487841	0.5327405922637494	0.6117182948671205
Subj_88	0.6426968443532681	0.5532941731037875	0.6376604556952704
Subj_89	0.6361902122906489	0.5406262223735184	0.62840197958557
Subj_90	0.6280376329157313	0.5360980304927148	0.6198266273896071
Subj_91	0.6610815461136752	0.575814764431598	0.6521698665182705
Subj_92	0.6603446126626267	0.5641570573678311	0.6528499887434014
Subj_93	0.6864020392128194	0.5862700144145716	0.6751270517801833
Subj_94	0.6292009627545849	0.5455923445746752	0.6221541270014774
Subj_95	0.6371533068482949	0.5429616365529573	0.6280742395640281
Subj_96	0.631190854295457	0.5399177716635194	0.620677939959391
Subj_97	0.6622058592528272	0.5640912182641645	0.6521875082058307
Subj_98	0.6681220517758897	0.5804167600229828	0.6690725189817847
Subj_99	0.6101410655667994	0.5210630629021948	0.6055132806536327
Subj_100	0.6312712893873068	0.5393150511990439	0.6201826508379407
Subj_101	0.6585171729957178	0.5758079269935221	0.6578308145141376
Subj_102	0.5357983388833236	0.4576711333229332	0.5362274540325597
Subj_103	0.6397049978346849	0.5467117436719633	0.632213142812632
Subj_104	0.666333975056748	0.5768147921679815	0.6652630177495448
Subj_105	0.6337562769177426	0.5443631426311805	0.6251299172617429
Subj_106	0.634173232964208	0.5486504664401713	0.6259642636282559
Subj_107	0.6589033761588802	0.5612916743571349	0.6563771586534977
Subj_108	0.6403333283174066	0.5423039628329128	0.6295557071177386
Subj_109	0.6086400811722099	0.516804702333384	0.6047783149501471
Subj_110	0.6157141422069189	0.5252457454952381	0.6120544038229279
Subj_111	0.6142961771296117	0.5287499832754535	0.6069566937106339
Subj_112	0.6887196573289465	0.5990623251097043	0.6834666429198214
Subj_113	0.6741366038159963	0.5901890129590895	0.6734874646283076
Subj_114	0.6832267320047611	0.5925586381186717	0.6784588851779565
Subj_115	0.6362701689390783	0.5479833202351662	0.6280117618587175
Subj_116	0.6529692992040484	0.5660116005868912	0.6524293684364288
Subj_117	0.651050604246269	0.5608810036367141	0.6422907331578855
Subj_118	0.6616586916930735	0.5713127569977875	0.6550032676389769
Subj_119	0.6365793278373705	0.5413986880941458	0.630746185136488
Subj_120	0.6126548446838912	0.5251540969727858	0.6029398631774706
Subj_121	0.632362216877481	0.5383793885745461	0.6221617550410958
Subj_122	0.6061889888274691	0.5268341048250443	0.6060048405544475
Subj_123	0.6209760813144819	0.5392472220769762	0.6217911274807154
Subj_124	0.5969783939120297	0.5158124332498254	0.5952499357260734
Subj_125	0.609957870007347	0.5213241954187433	0.6007320379753208
Subj_126	0.4818907664559865	0.40413737031033387	0.48180088687863265
Subj_127	0.6264036293487512	0.538686775919462	0.6244484734860761
Subj_128	0.6571249687453727	0.5640183247082768	0.6511371193874613
Subj_129	0.630889692375081	0.5381701897109412	0.6272062986145673
Subj_130	0.6283463458722426	0.5483758977491658	0.6296764066554162
Subj_131	0.6409887403232065	0.5566009085277022	0.6382127230687871
Subj_132	0.6497603355488818	0.5561794367712876	0.643805291312804
Subj_133	0.6268716515838112	0.5467178784245585	0.6218485497426881
Subj_134	0.5499764233467525	0.47605449823784624	0.5484338902349332
Subj_135	0.6636172079319659	0.5669962838478956	0.6578629161074123
Subj_136	0.6185748117271718	0.5437782494599506	0.6248562003285104
Subj_137	0.6052465432336693	0.5191667515964075	0.6004312913982777
Subj_138	0.6303053654611969	0.530020908650194	0.6175319132694826
Subj_139	0.6601124533186519	0.575598309384407	0.661361581082186
Subj_140	0.5979324359921806	0.5185953007032226	0.5921112165522365
Subj_141	0.6510647222192188	0.563430115786871	0.6425363920257808
Subj_142	0.6414210515259903	0.5524939161047554	0.6345952609469394
Subj_143	0.6246287758260696	0.5328492516394806	0.6169360125382671
Subj_144	0.5927401141344074	0.5182467721248225	0.5953818204017876
Subj_145	0.5975728160516134	0.5088047691023209	0.5829021358410827
Subj_146	0.6111800363174374	0.5226310694980977	0.6009228024743445
Subj_147	0.5820532822875985	0.4995557030840875	0.582264423699408
Subj_148	0.6252544687506898	0.5437679826041832	0.6277064966855457
Subj_149	0.6528076951516915	0.554651549898891	0.6518435987494257
Subj_150	0.5877225086029916	0.5042804488516633	0.5803784620295004
Subj_151	0.5644386705537885	0.4961291905245594	0.5711373758956063
Subj_152	0.5971675241300711	0.514418705759421	0.5920298033334818
Subj_153	0.5952962430698515	0.5057736552373648	0.5857966451447376
Subj_154	0.5872850191004068	0.5086143420620144	0.5806743560549142
Subj_155	0.59321572268125	0.5062859427602333	0.5867022002661761
Subj_156	0.5564261566579486	0.4765165720362066	0.5521759537511812

## Sheet: MI water males
	Initial	Synthetic	Refined
Subj_1	0.5394539458242882	0.4873851028309839	0.5578163266344803
Subj_2	0.6471478161092967	0.567885774246542	0.6500924190086208
Subj_3	0.5589606522125922	0.4993550946398395	0.5718313303329916
Subj_4	0.5862275274475508	0.5209628845141918	0.5958758243378752
Subj_5	0.5536334000574182	0.5017547431188387	0.5769796224096568
Subj_6	0.6265649693266833	0.5470808197196202	0.6265726874545139
Subj_7	0.6287053098410844	0.5419409247870524	0.6263486634051132
Subj_8	0.7212828840546985	0.6300264541124742	0.7182948028363743
Subj_9	0.6092000910012589	0.5305196152561604	0.6117019616247267
Subj_10	0.6040650173105999	0.5297204962453235	0.610425592754267
Subj_11	0.7028462823710901	0.612040551569363	0.7020782178713056
Subj_12	0.5328587255753081	0.4775729980398585	0.5479292680426537
Subj_13	0.5978367465330162	0.5291169723411506	0.6060116850259906
Subj_14	0.6752192889689409	0.5834387360990834	0.6678846239718756
Subj_15	0.6877867606699697	0.6029211144927195	0.6863256039559
Subj_16	0.7312250069161166	0.6449943283401629	0.7330089932228452
Subj_17	0.6001878993483969	0.5348712702760121	0.6087135601978468
Subj_18	0.6366324870354075	0.5528681998002162	0.6368050409133627
Subj_19	0.6592213909337915	0.5806861773580649	0.6633349523985286
Subj_20	0.5873962521817371	0.5280475532425987	0.6065126889218351
Subj_21	0.6373964105572711	0.5606194229233221	0.6410684614508325
Subj_22	0.5822131978347884	0.5124309265823922	0.5919084931937104
Subj_23	0.6642623849618469	0.5715247414115162	0.661883440178664
Subj_24	0.655986137838339	0.5753575003667873	0.6580439220206209
Subj_25	0.7695733653984498	0.6737954515254225	0.7657643111718437
Subj_26	0.671169843441002	0.5875635893583014	0.6684154422432489
Subj_27	0.6496939023648721	0.559500502886076	0.641665417837727
Subj_28	0.6382180205361253	0.5456382975396308	0.6314134889316005
Subj_29	0.6624011486588531	0.5735954833915402	0.6600145967042965
Subj_30	0.6583430863407445	0.5721483946022254	0.6568986889009487
Subj_31	0.6099495414026334	0.5381884827230013	0.617949698367638
Subj_32	0.6395185271055128	0.5636920182650079	0.6419485619187522
Subj_33	0.7052256387759285	0.6186076283877586	0.7055932357909036
Subj_34	0.7133378176035533	0.6266043089056615	0.715224925241142
Subj_35	0.6951252367667607	0.611029472050871	0.6947954666143312
Subj_36	0.6726074110526477	0.5911693476344361	0.671353957878096
Subj_37	0.6367778694331732	0.5654981172524773	0.6463792030907831
Subj_38	0.6530709987956806	0.5797178588781504	0.6623839018705762
Subj_39	0.7021869778919276	0.6167430292475163	0.701379323755608
Subj_40	0.6953815420286518	0.6117934267446757	0.6963957531517022
Subj_41	0.6844098881336309	0.6020281640414941	0.6844694143454342
Subj_42	0.7471920083589569	0.6612226333717517	0.7485387086654324
Subj_43	0.6877540271751279	0.5952214934145053	0.684749531124744
Subj_44	0.6964696086323473	0.6094663463748273	0.6951625459375417
Subj_45	0.6710095520116839	0.5830855242415451	0.6691617851729841
Subj_46	0.6742492350475807	0.5940542360901793	0.6779169665889746
Subj_47	0.6509429272446202	0.5717502842035092	0.6573372865079044
Subj_48	0.6365691151442897	0.5509488671613497	0.6342436178465243
Subj_49	0.6843431624748308	0.6085908107872463	0.6903719933909112
Subj_50	0.673379018659267	0.5861790851280453	0.6733519539063302
Subj_51	0.7078696683528777	0.6240691996265181	0.7153421312197298
Subj_52	0.714045265405911	0.6207744753911184	0.7111992761994579
Subj_53	0.6836761851357345	0.5990474065449412	0.6828318958739512
Subj_54	0.718864043616602	0.6299908707269226	0.7194511684516584
Subj_55	0.7023034110724018	0.6168986676489718	0.7075282522374129
Subj_56	0.6897030633873011	0.6066001479886127	0.6905457516395967
Subj_57	0.6906031933783627	0.608114123458062	0.6925581376122054
Subj_58	0.736180577125565	0.6529410200498161	0.7386438792450019
Subj_59	0.727105281093996	0.6414019483312059	0.7264935369835168
Subj_60	0.6830947202403839	0.602364316634947	0.6870671564153459
Subj_61	0.6829653158604133	0.5953973469553206	0.6829485424259216
Subj_62	0.726549712460558	0.6405443359556677	0.7267798742145196
Subj_63	0.706685731648178	0.6194352914147079	0.7054614319480368
Subj_64	0.639236621393334	0.56919529251401	0.6501269263837942
Subj_65	0.6893365569815318	0.6044243798697746	0.6913939961182692
Subj_66	0.6494269283687826	0.5798081967285815	0.6619124474688851
Subj_67	0.6566362573693434	0.5805745507564557	0.6631593906993336
Subj_68	0.7412322436306785	0.6597404326367088	0.740234214093624
Subj_69	0.7065114171728073	0.6180735193857587	0.7056000520874173
Subj_70	0.6418054811916344	0.5628436128926313	0.6478005160149435
Subj_71	0.6806826451765067	0.5939549495854825	0.6791374683156574
Subj_72	0.715947995114556	0.6328614838828095	0.7166294326091208
Subj_73	0.709847194326572	0.6207958074982378	0.705750405200411
Subj_74	0.6982973291772133	0.6150263206932247	0.6984543004690986
Subj_75	0.6991960124751229	0.6116837612491206	0.7039900204942569
Subj_76	0.6546316911043399	0.573476567696647	0.6588221246619569
Subj_77	0.6530721647872149	0.5753568301606856	0.6572728312246363
Subj_78	0.6375181929924039	0.5560135519945881	0.644992755636311
Subj_79	0.6430977127589819	0.56743362675845	0.6509414724658666
Subj_80	0.7102152139820421	0.6294747467545492	0.7116641950303069
Subj_81	0.7118398860030452	0.6307277895386953	0.713593061662305
Subj_82	1.3652918053497183	1.3315683862037149	1.433536688599545
Subj_83	0.7165411386069946	0.6315631328206394	0.715948046758873
Subj_84	0.6801515731379536	0.5983446186438901	0.6814095392632521
Subj_85	0.7083030493603384	0.6266213093728443	0.7124726776566157
Subj_86	0.6887145231158206	0.5981984035605752	0.6875456360279799
Subj_87	0.66136360927878	0.5878310772275441	0.6620733754861208
Subj_88	0.7117321083358256	0.6245110862124357	0.7108870601732298
Subj_89	0.6868924482142293	0.6059597668754938	0.6891945392314769
Subj_90	0.6746477004885084	0.5951390926624547	0.6784439930139208
Subj_91	0.7179635625108476	0.6334067846354497	0.7162484107907972
Subj_92	0.7249118221882791	0.632887032550077	0.7213334952742094
Subj_93	0.7426596383792947	0.6543719879420111	0.7395800055403707
Subj_94	0.6859679453211124	0.6089597437383034	0.6897075892768725
Subj_95	0.6930486296146642	0.6076309524287841	0.6944758398155502
Subj_96	0.692203860077387	0.6031467722932021	0.6888556189470131
Subj_97	0.7124555746115241	0.6303597549384591	0.7191654202083735
Subj_98	0.7431698366042421	0.6500802473376118	0.7397850168788134
Subj_99	0.6582258168683897	0.5801047156744856	0.6676642488420841
Subj_100	0.6910042758961527	0.6036465592854822	0.6877090296277191
Subj_101	0.7129352590626081	0.6294131241894521	0.7121774569456554
Subj_102	0.584689221813625	0.5087971784877581	0.5898588223205501
Subj_103	0.6999623394141253	0.6133861950881175	0.6982228496921661
Subj_104	0.7107861342710369	0.6349924031639647	0.7195643575859574
Subj_105	0.6880489932308445	0.6046470670129851	0.6881551525829814
Subj_106	0.6749420987077657	0.6025157551303909	0.6829973909481395
Subj_107	0.7281419716044804	0.6371067972461351	0.7294223982997408
Subj_108	0.6826578404042949	0.6046832164114564	0.687553493130669
Subj_109	0.672067706068957	0.5946477429616602	0.6769531833287217
Subj_110	0.6728193959876221	0.5880349324355383	0.6705282684977085
Subj_111	0.6828702100789942	0.5938941437177181	0.676171235007416
Subj_112	0.7612655557456913	0.6702820845346558	0.7579047580165021
Subj_113	0.7463286505756135	0.6585277167535513	0.7446278054583607
Subj_114	0.7478415824045442	0.6689877031417423	0.7530466544208699
Subj_115	0.6967785576401535	0.613581408693528	0.6982412681969725
Subj_116	0.7153082732754965	0.6288243524117116	0.7142395909464938
Subj_117	0.7035536899899105	0.6173093962611833	0.7039369217125431
Subj_118	0.7098365551932782	0.6355966133998698	0.716136974883642
Subj_119	0.6925109200171453	0.6103514378970494	0.694856367841555
Subj_120	0.6660901237373389	0.5855387973063269	0.6696019700705158
Subj_121	0.6904357866198245	0.6041135267322073	0.6884524575322176
Subj_122	0.6462541503514702	0.5747283303998251	0.6539799606156557
Subj_123	0.6889832635237076	0.6044197946912602	0.6905251584028793
Subj_124	0.6531267016014906	0.580555444140046	0.6617760112757776
Subj_125	0.6544424554028359	0.5820483392739492	0.6573936042204633
Subj_126	0.5050803897163972	0.43946802849717326	0.5136425501801769
Subj_127	0.668885413976183	0.598577024250184	0.6814649857857681
Subj_128	0.725522938463001	0.6324935155777703	0.7191665289542679
Subj_129	0.666523170244656	0.5921977470741591	0.6756289589973905
Subj_130	0.6794805542021417	0.608539510065751	0.6877469105841904
Subj_131	0.7020007516160078	0.6212638312173177	0.7035275847618874
Subj_132	0.685608700615756	0.6121369532803567	0.6926705105708807
Subj_133	0.6659921044067841	0.6059047241408007	0.6784307572948917
Subj_134	0.5887022757169107	0.5287597186484341	0.5996674932292243
Subj_135	0.7004342191485278	0.6207066805807209	0.7084069198628564
Subj_136	0.6800987315591436	0.609924724157343	0.6843006208030691
Subj_137	0.6375903672624501	0.5668142652046262	0.6479687860801869
Subj_138	0.6782510577710095	0.5989891129884826	0.6785414952854445
Subj_139	0.7217520749876223	0.6445184887221642	0.7274377840468982
Subj_140	0.6487296701973084	0.5809684213390638	0.6543131504498702
Subj_141	0.7041113769738727	0.6238478412411115	0.7062287318859333
Subj_142	0.7034422947274778	0.6220577031707302	0.707124805838402
Subj_143	0.6733520557954646	0.6008106269845805	0.68273235514298
Subj_144	0.6503457914295465	0.5820668602765641	0.6575658254419291
Subj_145	0.6308860312542248	0.5648511134746407	0.6344019478234958
Subj_146	0.6568168016099394	0.5870409483829448	0.6603870344566639
Subj_147	0.6233390754546497	0.5601790237387729	0.6390644001907553
Subj_148	0.6741139488400771	0.6072383709917899	0.6842580280680832
Subj_149	0.7133794764443281	0.6291119333868028	0.7172206686448843
Subj_150	0.6270921190261051	0.5603378240850775	0.6334579906858047
Subj_151	0.6190497136564914	0.5589327843553394	0.6324531159888576
Subj_152	0.6484991086871965	0.576689731568131	0.6524281994184029
Subj_153	0.6493771241642955	0.5681190995386727	0.6475459079646417
Subj_154	0.6312062831601953	0.5674329685383601	0.6413434535580557
Subj_155	0.6412413503590042	0.5690560916581774	0.6488319192616949
Subj_156	0.5960924997004287	0.5324843726450701	0.6086900637689212

## Sheet: AVC males
	Initial	Synthetic	Refined
AVC	0.486597	0.041567534	0.09196866
